# Supplementary material
Source: PubMed Central journal article supplement (PMC7965752)
Supplement: 3686_materials.pdf [file 3686_materials.pdf]

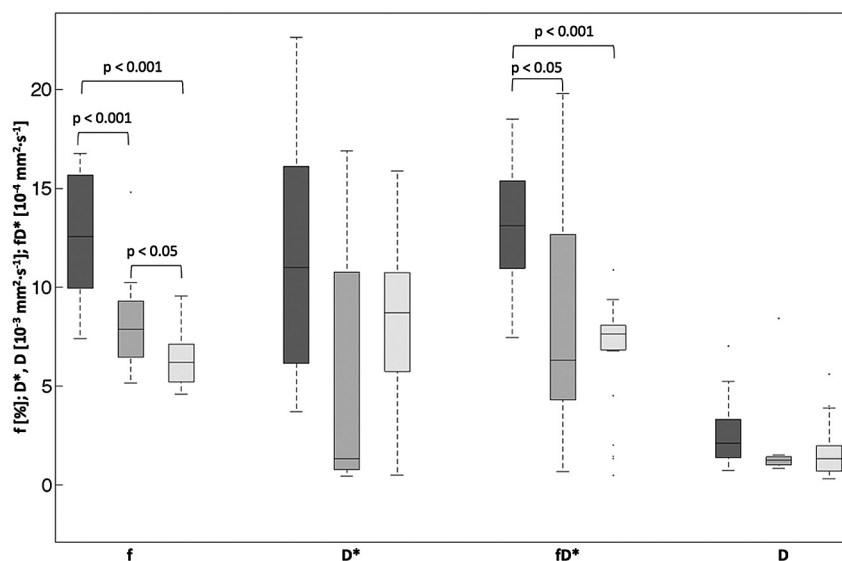

**ON-LINE FIG 1.** Box-and-whisker plot (median, 25th and 75th percentiles, minimum, maximum, and outliers) of  $f$ ,  $D^*$ ,  $fD^*$ , and  $D$ , as measured in ROIs of the maximum perfusion fraction  $f$ . Dark gray indicates high-grade tumors ( $n = 16$ ); medium gray, low-grade tumors ( $n = 11$ ; five with pathologic diagnosis, 6 with radiologic diagnosis); light gray, contralateral control region of both high- and low-grade tumors.  $P$  values are indicated when  $< .05$ .

**On-line Table 1. Patient demographics and tumor localization, included on radiologic criteria only**

| Low-Grade | Age (yr) | Sex    | Localization        |
|-----------|----------|--------|---------------------|
| 1         | 49       | Female | Right parietal lobe |
| 2         | 53       | Male   | Left parietal lobe  |
| 3         | 47       | Male   | Right insula        |
| 4         | 47       | Female | Left frontal lobe   |
| 5         | 20       | Male   | Tectal plate        |
| 6         | 43       | Male   | Left frontal lobe   |

## ON-LINE APPENDIX

### Materials and Methods

In this complementary study, the inclusion criteria for low-grade tumors were widened to include tumors that were diagnosed as highly probable low-grade gliomas on radiologic criteria only by 2 experienced neuroradiologists (P.M. and P.H.) in consensus, using the criteria of absence of progression in size during an extended time period and no contrast uptake. This permitted including 6 further cases for a total of 11 low-grade tumors (On-line

Table 1). The identical analysis leading to Fig 3 was performed to obtain On-line Fig 1.

### Results

In the region of interest of the maximum IVIM perfusion fraction in the 11 low-grade tumors defined on pathology or radiology,  $f = 0.083 \pm 0.026$ ,  $D^* = 0.0096 \pm 0.0042 \text{ mm}^2 \text{ s}^{-1}$ ,  $fD^* = 0.00083 \pm 0.00059 \text{ mm}^2 \text{ s}^{-1}$ , which were very similar to the values found for low-grade tumors defined on pathology only. The corresponding  $P$  values of this group versus the high-grade tumor group were  $P = .0003$ ,  $P = .14$ , and  $P = .02$ , for  $f$ ,  $D^*$ , and  $fD^*$ , respectively.

In the contralateral white matter brain region in the 11 low-grade tumors defined on pathology or radiology,  $f = 0.064 \pm 0.014$ ,  $D^* = 0.0095 \pm 0.0030 \text{ mm}^2 \text{ s}^{-1}$ ,  $fD^* = 0.00068 \pm 0.00025 \text{ mm}^2 \text{ s}^{-1}$ . The corresponding  $P$  values of this group versus the high-grade tumor group were  $P = .00000001$ ,  $P = .15$ , and  $P = .000002$ , for  $f$ ,  $D^*$ , and  $fD^*$ , respectively.
